# Supplementary material for: Phosphorus mobilizing consortium Mammoth P™ enhances plant growth
Source: PeerJ. 2016 Jun 14;4:e2121. doi: 10.7717/peerj.2121 (PMC4911952; doi:10.7717/peerj.2121)
Supplement: Table S1 — Detailing the data collected from the different greenhouse experiments. [file peerj-04-2121-s001.xlsx]

## Sheet: Emergence
Plant type	Treatment	Emergence (%)
Basil	Water	83.3333
Brandywine	Water	75
Broccoli	Water	41.6667
Cherry Toms	Water	91.6667
Jalapenos	Water	66.6667
Marigolds	Water	58.3333
Basil	Media	66.6667
Brandywine	Media	91.6667
Broccoli	Media	75
Cherry Toms	Media	83.3333
Jalapenos	Media	83.3333
Marigolds	Media	41.6667
Brandywine	Metab	75
Cherry Toms	Metab	66.6667
Jalapenos	Metab	83.3333
Marigolds	Metab	91.6667
Basil	Metab	66.6667
Basil	Mammoth P	91.6667
Brandywine	Mammoth P	66.6667
Broccoli	Mammoth P	50
Cherry Toms	Mammoth P	66.6667
Jalapenos	Mammoth P	91.6667
Marigolds	Mammoth P	41.6667
Basil	Fert	25
Brandywine	Fert	41.6667
Broccoli	Fert	16.6667
Cherry Toms	Fert	41.6667
Jalapenos	Fert	50
Marigolds	Fert	8.3333
Brandywine	Fert&Metab	91.6667
Broccoli	Fert&Metab	50
Cherry Toms	Fert&Metab	25
Cherry Toms	Fert&Metab	41.6667
Jalapenos	Fert&Metab	33.3333
Marigolds	Fert&Metab	41.6667
Basil	Fert&Mammoth P	33.3333
Brandywine	Fert&Mammoth P	83.3333
Broccoli	Fert&Mammoth P	25
Jalapenos	Fert&Mammoth P	75
Marigolds	Fert&Mammoth P	33.3333

## Sheet: Blooming Jalapeno
Treatment	Time to first bloom (days)
Control	120
Control	121
Control	122
Control	123
Control	124
Control	125
Control	126
Control	127
Control
Control
Media	128
Media	129
Media	130
Media	131
Media	132
Media	133
Media	134
Media	135
Media	136
Media
Metab	106
Metab	107
Metab	108
Metab	109
Metab	110
Metab	111
Metab	112
Metab	113
Metab	114
Metab	115
Mammoth P	105
Mammoth P	105
Mammoth P	119
Mammoth P	105
Mammoth P	112
Mammoth P	131
Mammoth P	131
Mammoth P	112
Mammoth P	131
Mammoth P	112
Mammoth P
Fert	139
Fert	131
Fert	119
Fert	131
Fert	119
Fert&Metab	116
Fert&Metab	117
Fert&Metab	118
Fert&Metab	119
Fert&Mammoth P	105
Fert&Mammoth P	105
Fert&Mammoth P	105
Fert&Mammoth P	105
Fert&Mammoth P	112
Fert&Mammoth P	112
Fert&Mammoth P	105
Fert&Mammoth P	119
Fert&Mammoth P	105

## Sheet: Yield Jalapeno
Time since planting (days)	Cumulative Yield (g/plant)
	Mammoth P	Fertilizer	Fertilizer + Mammoth P	Metabolites	Fertilizer + Metabolites	Water	Media
146	0	0	14.637	0	0	0	0
160	10.912	0	26.305	0	0	0	0
166	11.912	0	26.305	0	0	0	1
173	24.932	0	50.305	0	0	0	12.85
178	24.932	0	50.305	0	2	0	12.85
185	24.932	19.43	57.865	0	15.46	5.47	23.69
187	33.042	19.43	57.865	0	15.46	5.47	23.69
146	0	0	0	0	0	0	0
160	0	0	0	0	0	0	15.382
166	1	0	0	0	0	0	15.382
173	6.91	15.58	44.419	6.54	0	0	15.382
178	6.91	15.58	46.419	6.54	2	0	17.382
185	17.98	27.59	49.509	6.54	4.23	0	17.382
187	17.98	27.59	49.509	21.06	19.35	16.63	30.952
146	10.419	7.965	0	0	0	0	0
160	10.419	19.261	16.375	0	0	0	0
166	10.419	19.261	18.375	0	0	0	0
173	10.419	44.541	39.055	14.6	15.07	0	10.88
178	12.419	45.541	39.055	15.6	15.07	0	10.88
185	24.819	45.541	39.055	15.6	25.53	2.84	22.75
187	24.819	54.121	39.055	17.71	34.3	31.48	22.75
146	13.523	0	0	0	0	0	0
160	13.523	16.736	0	0	0	0	0
166	13.523	16.736	2	0	1	0	0
173	13.523	47.896	18.67	0	1	0	3.47
178	13.523	47.896	18.67	2	6	0	6.47
185	29.213	54.356	34.99	11.58	29.84	11.25	6.47
187	29.213	63.296	55.88	11.58	29.84	19.81	6.47
146	0	0	0	0		0	0
160	0	13.148	0	0		0	0
166	0	13.148	0	1		0	0
173	21.5	13.148	23.61	1		0	0
178	21.5	18.148	24.61	1		0	0
185	34.6	18.148	24.61	1		11.86	15.2
187	34.6	41.288	27.7	1		22.46	15.2
146	0		13.121	0		0	0
160	0		13.121	0		0	0
166	0		14.121	0		0	1
173	0		50.641	24.67		0	1
178	0		51.641	24.67		0	1
185	3.59		59.441	35.35		19.94	10.87
187	3.59		63.701	35.35		19.94	10.87
146	0		58.505	15.965		0	0
160	0		58.505	15.965		0	0
166	0		58.505	15.965		0	0
173	0		76.865	15.965		0	0
178	0		76.865	15.965		0	1
185	2.63		76.865	23.885		0	1
187	5.98		76.865	25.815		10.42	6.74
146	0		0	0		0	0
160	0		0	14.005		0	0
166	0		0	14.005		0	1
173	5.37		17.06	36.805		0	1
178	6.37		18.06	36.805		2	2
185	26.22		41.86	44.895		2	5.61
187	26.22		41.86	44.895		5.97	9.06
146	0		14.823	0			0
160	0		14.823	12.178			15.3
166	0		16.823	12.178			15.3
173	12.97		33.443	12.178			15.3
178	12.97		33.443	12.178			15.3
185	24.64		33.443	27.068			31.42
187	24.64		33.443	46.828			31.42
146	13.601			0
160	13.601			0
166	13.601			0
173	25.571			5.85
178	26.571			7.85
185	34.721			7.85
187	34.721			16.7

## Sheet: Yield Basil
Time since planting (days)	Cumulative Yield (g/plant)
	Mammoth P	Fertilizer	Fertilizer + Mammoth P	Metabolites	Fertilizer + Metabolites	Water	Media
110	2.088	2.5169	2.1637	1.8206	1.9518	0.5895	1.1798
117	2.088	5.0409	3.8677	5.9476	2.5148	0.5895	1.1798
124	2.988	5.0409	6.3117	6.5856	3.3148	0.5895	1.1798
131	4.364	5.6579	6.3117	6.8466	4.5208	1.5295	2.3878
144	11.756	12.5659	11.3847	7.8176	10.8188	4.8815	8.3008
154	12.313	18.5239	25.0367	10.4786	20.2988	5.0145	9.5428
161	12.859	27.6229	33.4897	14.7916	25.5768	15.0495	14.6048
175	14.296	31.5189	39.9817	15.0496	33.4078	15.9855	16.4878
182	20.95	37.9849	45.3757	18.1616	39.9008	20.4575	22.0788
189	25.275	44.5619	47.0037	22.1516	43.2168	21.9155	29.3848
110	2.4261	1.5835	2.4059	2.8247		1.5784	2.1788
117	2.4261	1.5835	3.2139	2.8247		2.8024	2.5568
124	3.5021	2.1185	4.5759	3.4127		2.8024	3.3808
131	4.5821	3.3125	4.5759	5.1097		2.8024	3.6018
144	7.2711	8.6915	5.5759	12.3537		5.4634	5.7898
154	7.2711	16.9835	13.1799	12.8767		10.4744	7.7288
161	14.2311	26.2655	27.1319	13.9487		12.8564	9.5698
175	16.5111	31.7885	33.8929	14.7977		13.4404	9.5698
182	22.8701	38.5725	34.9799	17.9247		15.6884	11.7178
189	24.7401	42.9775	34.9799	23.0517		16.0714	13.9918
110	3.0971	1.861	3.7783	2.3605		0.6954	1.1798
117	5.3461	2.753	5.2953	2.3605		0.6954	1.1798
124	5.3461	4.942	5.8833	2.7305		0.6954	1.1798
131	6.5421	6.031	5.8833	3.8835		2.9884	3.3708
144	8.3121	8.17	7.8503	5.7815		4.8794	5.8268
154	11.4381	15.833	14.8923	6.2845		4.8794	5.8268
161	14.2871	24.491	22.6733	15.6295		7.2204	5.8268
175	18.6141	29.972	31.7773	15.6295		12.6064	11.0518
182	22.8261	37.894	36.5103	17.0505		17.7574	19.4858
189	24.0761	43.868	39.6913	18.2505		19.5234	21.8548
110	1.1293		1.4624	0.8972		1.0789	1.3917
117	1.1293		3.1144	0.8972		1.0789	3.5257
124	1.7813		5.0844	1.5022		2.1559	4.0837
131	2.4803		6.1184	2.0902		3.5649	4.4287
144	4.3413		10.8664	5.2072		7.6619	7.9407
154	4.5113		18.8414	5.9652		7.7889	9.1277
161	10.7903		29.4514	5.9652		13.1749	14.7127
175	12.8013		33.9484	5.9652		13.5269	15.6567
182	17.3533		42.5114	7.4122		14.2499	19.1607
189	17.3533		45.3174	11.7812		15.8079	22.3067
110	2.0022			2.4059		1.1293	2.976
117	3.0622			2.9609		1.1293	2.976
124	3.6522			3.6379		1.8603	4.853
131	3.6522			3.6379		3.2143	6.211
144	4.0692			10.4459		10.9803	18.073
154	4.7612			11.9589		11.3643	18.073
161	5.0822			14.0249		12.8053	18.226
175	6.1602			14.3589		15.2073	20.833
182	11.2882			15.8769		20.0053	24.71
189	14.5382			18.0639		22.5383	34.937
110	1.528			1.2858		2.5068	1.649
117	1.528			1.8318		3.3928	1.649
124	3.264			2.4788		3.8038	2.056
131	3.264			3.0588		5.3038	3.462
144	10.533			6.5258		9.2718	9.798
154	11.887			7.2818		10.0398	10.12
161	15.166			10.5128		11.4358	13.871
175	16.396			15.8838		13.0918	13.871
182	17.651			15.8838		17.4968	15.764
189	19.521			20.0518		20.6918	18.871
110	1.7752			2.9357		1.422	0.7358
117	5.8862			5.2827		1.991	0.7358
124	5.8862			5.2827		2.223	1.3048
131	6.6232			5.6867		4.406	1.3048
144	8.9152			9.3787		7.562	6.7098
154	12.0092			10.3887		11.193	7.6938
161	15.0392			14.1317		14.807	9.0348
175	15.9192			18.3127		18.707	10.0648
182	19.8172			20.2977		21.823	14.1328
189	20.9422			22.5577		23.979	20.2048
110	1.3261			2.0174		0.7257	2.1183
117	1.3261			2.0174		0.7257	2.8213
124	1.3261			3.4574		0.7257	3.4443
131	3.3771			4.6804		2.4517	4.6753
144	7.8931			10.9064		8.6107	8.8983
154	8.3981			11.5674		8.6107	9.4893
161	9.1881			15.5424		9.5427	13.1793
175	10.0941			17.0504		12.2927	14.1553
182	13.9961			17.0504		13.6397	14.6773
189	18.7781			18.9444		14.4977	16.0753
110	1.4371					1.0587
117	1.4371					1.0587
124	2.8021					1.0587
131	3.2671					1.0587
144	3.2671					5.4287
154	6.7211					5.6157
161	8.1231					9.4057
175	8.1231					9.9147
182	12.3241					9.9147
189	13.8371					12.4637
110	1.2605					1.0537
117	1.2605					1.0537
124	1.2605					1.2457
131	3.2325					2.2487
144	6.4275					5.7457
154	6.6055					6.2767
161	9.9515					6.2767
175	11.1405					9.1497
182	17.3235					11.0597
189	21.9575					11.0597
110	1.2353
117	1.2353
124	1.2353
131	2.9003
144	6.8973
154	8.2983
161	10.7973
175	14.2423
182	20.1323
189	24.6813

## Sheet: Cherry Tomato
Time since planting (days)	Total Tomato Count per plant
	Mammoth P	Fertilizer	Fertilizer + Mammoth P	Metabolites	Fertilizer + Metabolites	Water	Media
73	0	0	0	0	0	0	0
92	0	0	0	0	1	0	0
101	0	3	0	2	7	0	2
113	5	8	10	9	17	8	8
73	0	0	0	0	0	0	0
92	2	0	0	0	3	0	0
101	5	3	0	0	10	0	3
113	10	9	13	9	18	9	14
73	0	0	0	0	0	0	0
92	0	2	0	0	4	0	0
101	0	5	6	0	6	3	2
113	5	14	16	10	19	10	7
73	0	0	0	0		0	0
92	0	2	0	0		2	0
101	0	5	1	3		5	0
113	5	14	16	8		14	7
73	0		0	0		0	0
92	0		0	1		0	0
101	2		0	2		1	1
113	12		7	11		8	4
73	0			0		0	0
92	0			0		2	0
101	0			2		5	2
113	8			11		7	5
73	0					0	0
92	1					0	0
101	1					0	2
113	7					5	8
73						0	0
92						1	0
101						1	1
113						10	7
73						0	0
92						0	0
101						3	2
113						7	4
73						0	0
92						1	0
101						2	0
113						9	3

## Sheet: Wheat
Treatment	Aboveground biomass (g/plant)
	Byrd - Waverly	Hatcher - Waverly	Byrd - ARDEC	Hatcher - ARDEC
Water	1.011	1.391	1.426
Water	1.028	1.734	0.883	0.692
Water	0.632		0.921	0.848
Water	0.684	0.606	0.519
Water	0.849	0.662	1.073	1.387
Water	0.835	1.354	1.366	0.917
Water	0.588	0.992	1.532	0.386
Water	0.811	0.896	0.822	1.306
Metab	0.921	0.928	1.379	0.887
Metab	1.388	0.667	1.364	1.271
Metab	0.824	0.607	1.401
Metab	0.768	1.379	1.328	1.095
Metab	0.701	0.912	0.769	1.331
Metab	0.571		1.482	0.887
Metab	0.545	0.834	1.254	1.058
Metab	0.43	1.426	1.451	2.356
Fert	2.107	0.762	1.24
Fert	1.111	1.401	1.658	1.029
Fert	0.679	0.966	0.836	1.383
Fert	1.002	0.776	1.086	1.032
Fert	0.701	1.178	1.002	1.317
Fert	0.889	1.399	1.759	1.225
Fert	1.369	0.653	0.804	1.185
Fert	0.725	1.325	1.256	0.754
Mammoth P	1.126	1.15	1.507	1.387
Mammoth P	1.013	1.482	1.632
Mammoth P	1.111	1.377	1.34	1.433
Mammoth P	1.119	1.137	1.006	1.299
Mammoth P	0.887	1.446		1.652
Mammoth P	0.99	0.53	1.799	1.568
Mammoth P	1.637	1.342	1.374	1.473
Mammoth P	1.113	1.195	1.077	0.884
Accomplish LM	0.963	0.821	0.849	0.386
Accomplish LM	0.662	1.175	1.017	1.275
Accomplish LM	0.956	0.849	1.203	0.883
Accomplish LM	0.959	0.701	1.327	1.824
Accomplish LM	1.056	1.7	0.729	1.411
Accomplish LM	0.719	0.902	0.661	2.272
Accomplish LM	0.58	0.718	0.133	1.506
Accomplish LM	0.268	0.843	0.867	1.238

## Sheet: Turf grass
Treatment	Weight (g/m2)
Water	58.093
Water	47.2969
Water	37.015
Metab	63.491
Metab	55.2654
Metab	64.5192
Metab	57.3218
Mammoth P	57.0648
Mammoth P	49.8674
Mammoth P	115.415
Mammoth P	53.7232
Fert	59.8923
Fert	31.617
Fert	51.1527
Fert	44.9835
Fert&Metab	85.3401
Fert&Metab	73.7729
Fert&Metab	77.1146
Fert&Metab	123.64
Fert&Mammoth P	70.4313
Fert&Mammoth P	104.362
Fert&Mammoth P	79.428
Fert&Mammoth P	73.2588
